# Supplementary material for: Identifying Common Pathogenic Features in Deep Endometriotic Nodules and Uterine Adenomyosis
Source: MDPI journal article supplement (doi:10.3390/jcm10194585), 2021-10-04
Supplement: s1 [file s1]

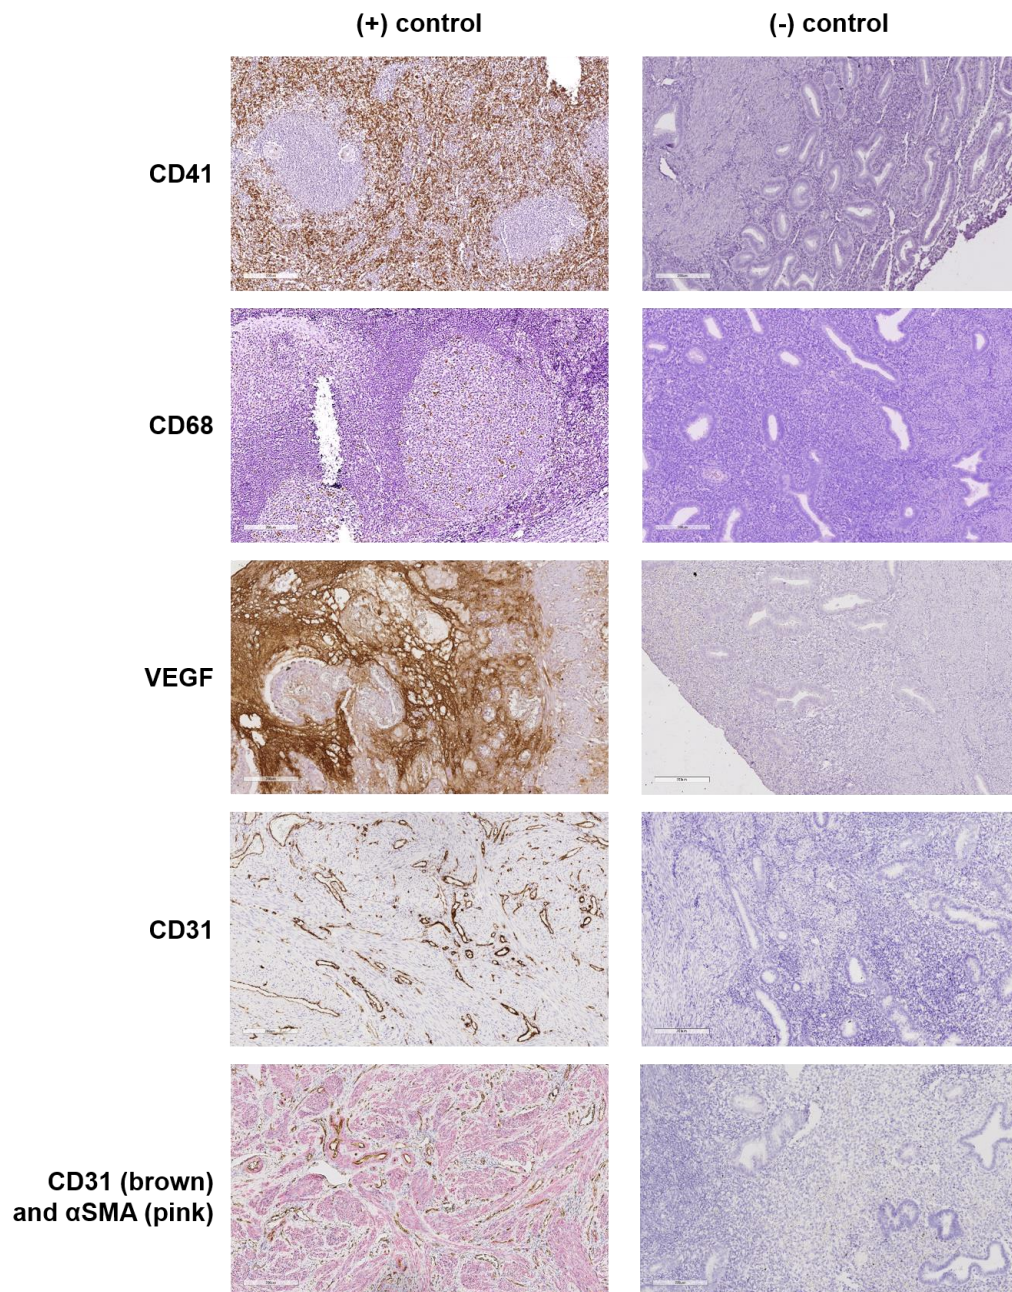

**Supplementary figure S1.** Representative images of positive and negative controls. As positive control we used human tissue sections from: spleen for CD41; tonsil for CD68; rectum for VEGF; uterus for CD31; uterus (smooth muscle) for CD31+ $\alpha$ SMA. Endometrial sections were used as negative control. Scale bar represents 200  $\mu$ m.
